# Supplementary material for: Lysosome-oriented, dual-stage pH-responsive polymeric micelles for β-lapachone delivery
Source: Royal Society of Chemistry journal article supplement (doi:10.1039/c6tb02049f), 2016-01-01
Supplement: c6tb02049f1.pdf [file c6tb02049f1.pdf]

## **Lysosome-Oriented, Dual Stages pH-Responsive Polymeric Micelles for $\beta$ -Lapachone Delivery**

Yinjian Zhou <sup>a,b</sup>, Ying Dong <sup>c</sup>, Gang Huang <sup>b</sup> Yiguang Wang <sup>b</sup>, Xiaonan Huang <sup>b</sup>, Fayun Zhang <sup>a</sup>, David A. Boothman <sup>c</sup>, Jinming Gao,<sup>b</sup> Wei Liang<sup>a,\*</sup>

<sup>a</sup> *Protein and Peptide Pharmaceutical Laboratory, Institute of Biophysics, Chinese Academy of Sciences, Beijing, China*

<sup>b</sup> *Department of Pharmacology, Harold C. Simmons Comprehensive Cancer Center, UT Southwestern Medical Center at Dallas, 5323 Harry Hines Blvd, Dallas, Texas 75390;*

<sup>c</sup> *Laboratory of Molecular Stresses, Departments of Pharmacology and Radiation Oncology, Harold C. Simmons Comprehensive Cancer Center, UT Southwestern Medical Center at Dallas, 6001 Forest Park Drive, ND2.210K Texas 75390-8807*

\*Corresponding author: 15 Datun Road, Chaoyang District, Beijing, 100101, China. E-mail: weixx@sun5.ibp.ac.cn

### Synthesis of prodrug (I), (V) and (VI)

The three prodrugs were synthesized using the same method. For example, prodrug (IV) was prepared in the following procedure.  $\beta$ -lap (100 mg, 0.41 mmol), acetic hydrazine (49.7mg, 0.45 mmol) (or equivalent mole of 5-amino-1-pentanol, or 4-amino-2-methyl-phenol) and 100  $\mu$ L HOAc were mixed with 5 mL anhydrous methanol and kept refluxing in a single neck flask for 24 hrs. After removing the solvent under vacuum, the residues were redissolved in 30 mL of EtOAc, followed by rinse with saturated NaHCO<sub>3</sub> aqueous solution 3 times, and saturated NaCl aqueous solution for another 3 times. 53.5 mg of prodrug (IV) was obtained by silicone gel chromatography with eluent of Hexane/ EtOAc= 4:1.

**(Z)-N'-(2,2-dimethyl-5-oxo-3,4-dihydro-2H-benzo[h]chromen-6(5H)-ylidene)acetohydrazide (I)**, yield, 80.2%, **MS**: 299.1 [M+H]<sup>+</sup>, <sup>1</sup>HNMR (500MHz, CDCl<sub>3</sub>)  $\delta$ : 8.121 (1H, s), 7.861-7.864 (1H, d, J=7.5), 7.491-7.427(2H, m), 2.560-2.534 (2H, t, J=6.5), 2.468 (3H, s), 1.849-1.823(2H, t, J=6.5), 1.661(1H, s), 1.437 (6H, s). <sup>13</sup>CNMR (125MHz, CDCl<sub>3</sub>)  $\delta$ : 181.5(1C), 175.2(1C), 161.2(1C), 131.8(1C), 129.9(1C), 128.6(1C), 126.9(1C), 123.3(3C), 111.4(1C), 78.5(1C), 31.6 (1C), 26.8(2C), 19.9(1C), 16.0(1C).

**(E)-6-(5-hydroxypentylimino)-2,2-dimethyl-3,4-dihydro-2H-benzo[h]chromen-5(6H)-one (V)**, yield 52%, **MS**: 326.2 [M+H]<sup>+</sup>, <sup>1</sup>HNMR (500MHz, CDCl<sub>3</sub>)  $\delta$ : 8.331-8.314 (1H, d, J=7.0), 8.278-8.261 (1H, d, J=7.0), 7.582-7.552 (1H, t, J=7.5), 7.469-7.438 (1H, t, J=7.5), 3.728-3.703 (2H, t, J=6.5Hz), 3.063-2.991 (4H, m), 2.063-2.004 (2H, m), 1.966-1.940 (2H, t, J=6.5), 1.771-1.716(2H, m), 1.455(6H, s). <sup>13</sup>CNMR(125MHz,CDCl<sub>3</sub>)  $\delta$ : 164.5 (1C), 147.8 (1C), 147.4 (1C), 126.9 (1C), 125.2 (1C), 124.5 (2C), 123.9 (1C), 122.8 (1C), 121.8 (1C), 102.0 (1C), 75.3 (1C), 62.3 (1C), 32.4 (1C), 32.0 (1C), 26.9 (2C), 26.1 (1C), 23.4(1C), 17.6 (1C).

**3,3,11-trimethyl-2,3,13,13a-tetrahydrobenzo[a]pyrano[2,3-c]phenol-xazin-12(1H)-one (VI)**. Yield, 43%, **MS**: 346.1 [M+H]<sup>+</sup>, <sup>1</sup>HNMR (500MHz,CDCl<sub>3</sub>)  $\delta$ : 8.821-8.805 (1H, d, J=8.0Hz), 8.251-8.235 (1H, d, J=8.0Hz), 7.726-7.696(1H, t, J=7.5Hz), 7.592-7.562(1H, t, J=7.5Hz), 6.771(1H, s), 6.364-6.360(1H, d, J=2Hz), 3.017-2.991(2H, t, J=6.5Hz), 2.580(3H, s), 2.029-2.002(2H, t, J=6.5Hz), 1.516(6H, s). <sup>13</sup>CNMR(125MHz,CDCl<sub>3</sub>)  $\delta$ : 185.8 (1C), 155.5 (1C), 151.2 (1C), 143.5 (1C), 142.9 (1C), 142.4 (1C), 132.1 (1C), 130.4 (1C), 128.8 (1C), 126.4(1C), 123.8 (1C), 123.2 (1C), 122.4 (1C), 122.3 (1C), 105.1 (1C), 104.8(1C), 78.3(1C), 31.8(1C), 27.0(2C), 16.7(2C).

### Synthesis of (II) and (III) [1]

$\beta$ -lap (94.2 mg, 0.389 mmol), 1,1,1-Trimethanolethane 2-(Hydroxymethyl)-2-methyl-1,3-propanediol(140 mg, 1.17 mmol) and p-toluenesulfonic acid (10.3 mg, 0.054 mmol) was added into 15 mL anhydrous benzene in a single neck flask, decorated with a Dean-Stark trap. the reaction was kept refluxing for 48 hrs. After removing benzene under vacuum, the residues were redissolve in 30 mL EtOAc, followed by rinse with saturated NaHCO<sub>3</sub> aqueous solution for 3 times, and saturated NaCl aqueous solution 3 times. 25.7 mg of prodrug (II) and 15.3 mg of prodrug (III) were obtained by silicone gel chromatography with eluent Hexane/ EtOAc=6:1.

**(2'r, 5'r)-5'-(hydroxymethyl)-2,2,5'-trimethyl-3,4-dihydrospiro[benzo[h]chromene-6,2'-[1,3]dio xan] -5(2H)-one (II)** yield 35%, **MS**: 345.1[M+H]<sup>+</sup>, <sup>1</sup>HNMR (500MHz,CDCl<sub>3</sub>)  $\delta$ : 7.821-7.803 (1H, dd, J=1.0), 7.743-7.726(1H, dd, J=1.0), 7.461-7.428(1H, ddd, J=1.5),7.401-

7.368(1H, ddd, J=1.5), 4.611-4.588 (2H, d, J=11.5), 4.010(2H, s), 3.786-3.763(2H, d, J=11.5), 2.458-2.431(2H, t, J=6.5), 1.807-1.781(2H, t, J=6.5), 1.457 (3H, s), 1.409 (6H, s). <sup>13</sup>CNMR (125MHz, CDCl<sub>3</sub>) δ: 194.1 (1C), 160.7 (1C), 139.0 (1C), 130.5 (1C), 129.5 (1C), 128.4 (1C), 127.4 (1C), 123.7 (1C), 107.0 (1C), 89.7 (1C), 78.3 (1C), 67.7 (1C), 66.4 (2C), 35.0 (1C), 32.0 (1C), 27.0 (2C), 17.5(1C), 15.9 (1C).

**(2's, 5's)-5'-(hydroxymethyl)-2,2,5'-trimethyl-3,4-dihydrospiro[benzo[h]chromene-6,2'-[1,3]dioxane]-5(2H)-one (III)** yield= 25%, **MS:** 345.1 [M+H]<sup>+</sup>, <sup>1</sup>HNMR (500MHz,CDCl<sub>3</sub>) δ: 7.912-7.894(1H, dd, J=1.5), 7.754-7.736 (1H, dd, J=1.5), 7.486-7.453(1H, ddd, J=1.5), 7.395-7.377(1H, ddd, J=1.5), 4.769- 4.747 (2H, d, J=11.0), 3.632-3.609 (2H, d, J=11.5), 3.480 (2H, s), 2.453-2.426 (2H, t, J=7.0), 1.794-1.768(2H, t, J=6.5), 1.445(3H, s), 1.396(6H, s).<sup>13</sup>CNMR(125MHz,CDCl<sub>3</sub>) δ:194.3(1C), 160.7 (1C), 139.0(1C), 130.5(1C), 129.4(1C), 128.1(1C), 127.3(1C), 123.4 (1C), 106.9 (1C), 89.5(1C), 79.3 (1C), 68.7(1C), 67.5 (2C), 35.1(1C), 31.9 (1C), 26.9(2C), 19.8(1C), 15.9(1C).

#### Characterization of compound (IV)

**(E)-1-(4-(2,2-dimethyl-5-oxo-3,4-dihydro-2H-benzo[h]chromen-6(5H)-ylideneamino)phenyl)-1H-pyrrole-2,5-dione (VI)**, yield, 72.6 %, **MS:** 413.1 [M+H]<sup>+</sup>, <sup>1</sup>HNMR (500MHz,CDCl<sub>3</sub>) δ: 8.221-8.207 (1H, d, J=7.0), 7.846-7.826 (1H, d, J=10.0), 7.559-7.481 (2H,m), 7.340-7.322 (2H, d, J=9), 6.829-6.804 (4H,m), 2.432-2.406 (2H, t, J=6.5), 1.810-1.784 (2H, t, J=6.5), 1.444 (6H, s). <sup>13</sup>CNMR(125MHz,CDCl<sub>3</sub>) δ: 177.9 (1C), 170.2 (2C), 162.0 (1C), 153.0 (1C), 151.1 (1C), 134.3 (2C), 132.7 (1C), 131.6 (1C), 130.5 (2C), 130.3 (1C), 127.3 (1C), 126.6 (2C), 126.1 (1C), 123.7 (1C), 116.8 (2C), 112.4 (1C), 78.8 (1C), 32.0 (1C), 27.0 (2C), 16.3 (1C).

#### The absolute structure conformation of prodrug (II) and Prodrug (III).

The chemical shift on <sup>1</sup>HNMR of prodrug (II) and Prodrug (III) were different at several protons, they were in different spatial conformation. The chemical shifts and the coupling effect of the proton on methyl group or CH<sub>2</sub>-OH on the 1, 3-dioxane and α proton on the benzyl group were examined. The <sup>1</sup>HNMR spectra indicate that proton chemical shifts of CH<sub>2</sub>-OH ranges from 3.97 to 3.47 in prodrug (II) and Prodrug (III), while the chemical shifts of HO-CH<sub>2</sub>-C-CH<sub>3</sub> on 1,3-dioxane were 0.84 to 1.41, this indicate the two group in different electrons environment. The stretch direction of the HO-CH<sub>2</sub>- group and the -CH<sub>3</sub> group on the chiral carbon atom lead their protons in different electron environment. The absolute conformation of prodrug (II) and Prodrug (III) were confirmed by one dimensional nuclear Overhauser effect (1D- NOE). The positive NOE effects were observed not only among the protons of -CH<sub>2</sub>-OH group to its adjacent -CH<sub>3</sub> groups and one -CH<sub>2</sub>-O- groups of the 1, 3-dioxane structure in prodrug (II), but also between CH<sub>2</sub>-OH and α-proton of the aromatic ring, this indicate that the CH<sub>2</sub>-OH group stretch toward the benzyl direction, there is a shorter spatial length between them (**Figure S15**). However, The positive NOE effect only observed between the protons of -CH<sub>2</sub>-OH group and its adjacent -CH<sub>3</sub> groups and the two -CH<sub>2</sub>-O- groups of 1, 3-dioxane structure in prodrug (III), indicating the CH<sub>2</sub>-OH group stretch opposite to the benzyl direction (**Figure S16**).

**Figure S1:** Chemical structure of  $\beta$ -lap derivatives (V) and (VI)

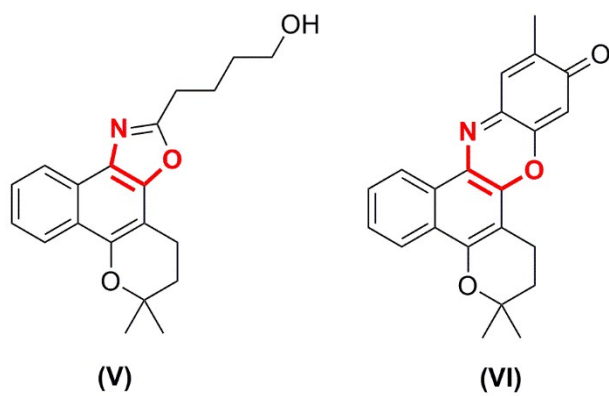

Figure S2:  $^1\text{H}$ NMR of (I)

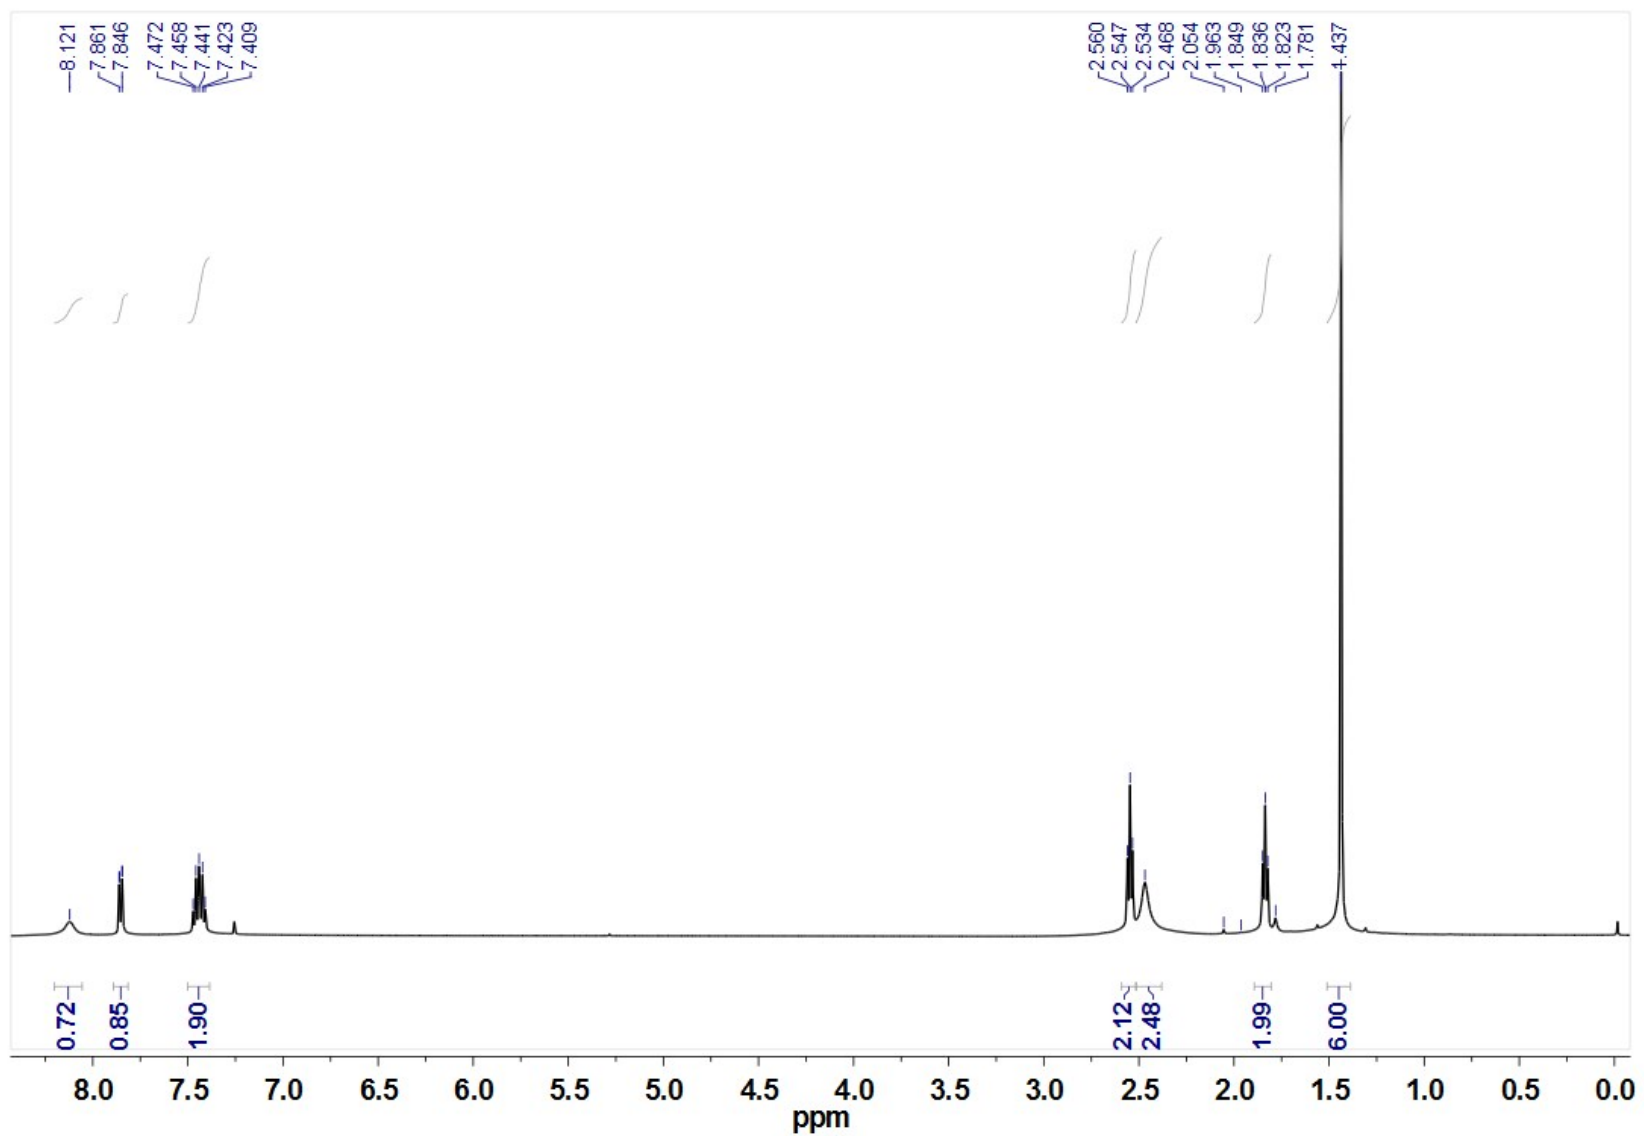

Figure S3:  $^{13}\text{C}$ NMR of (I)

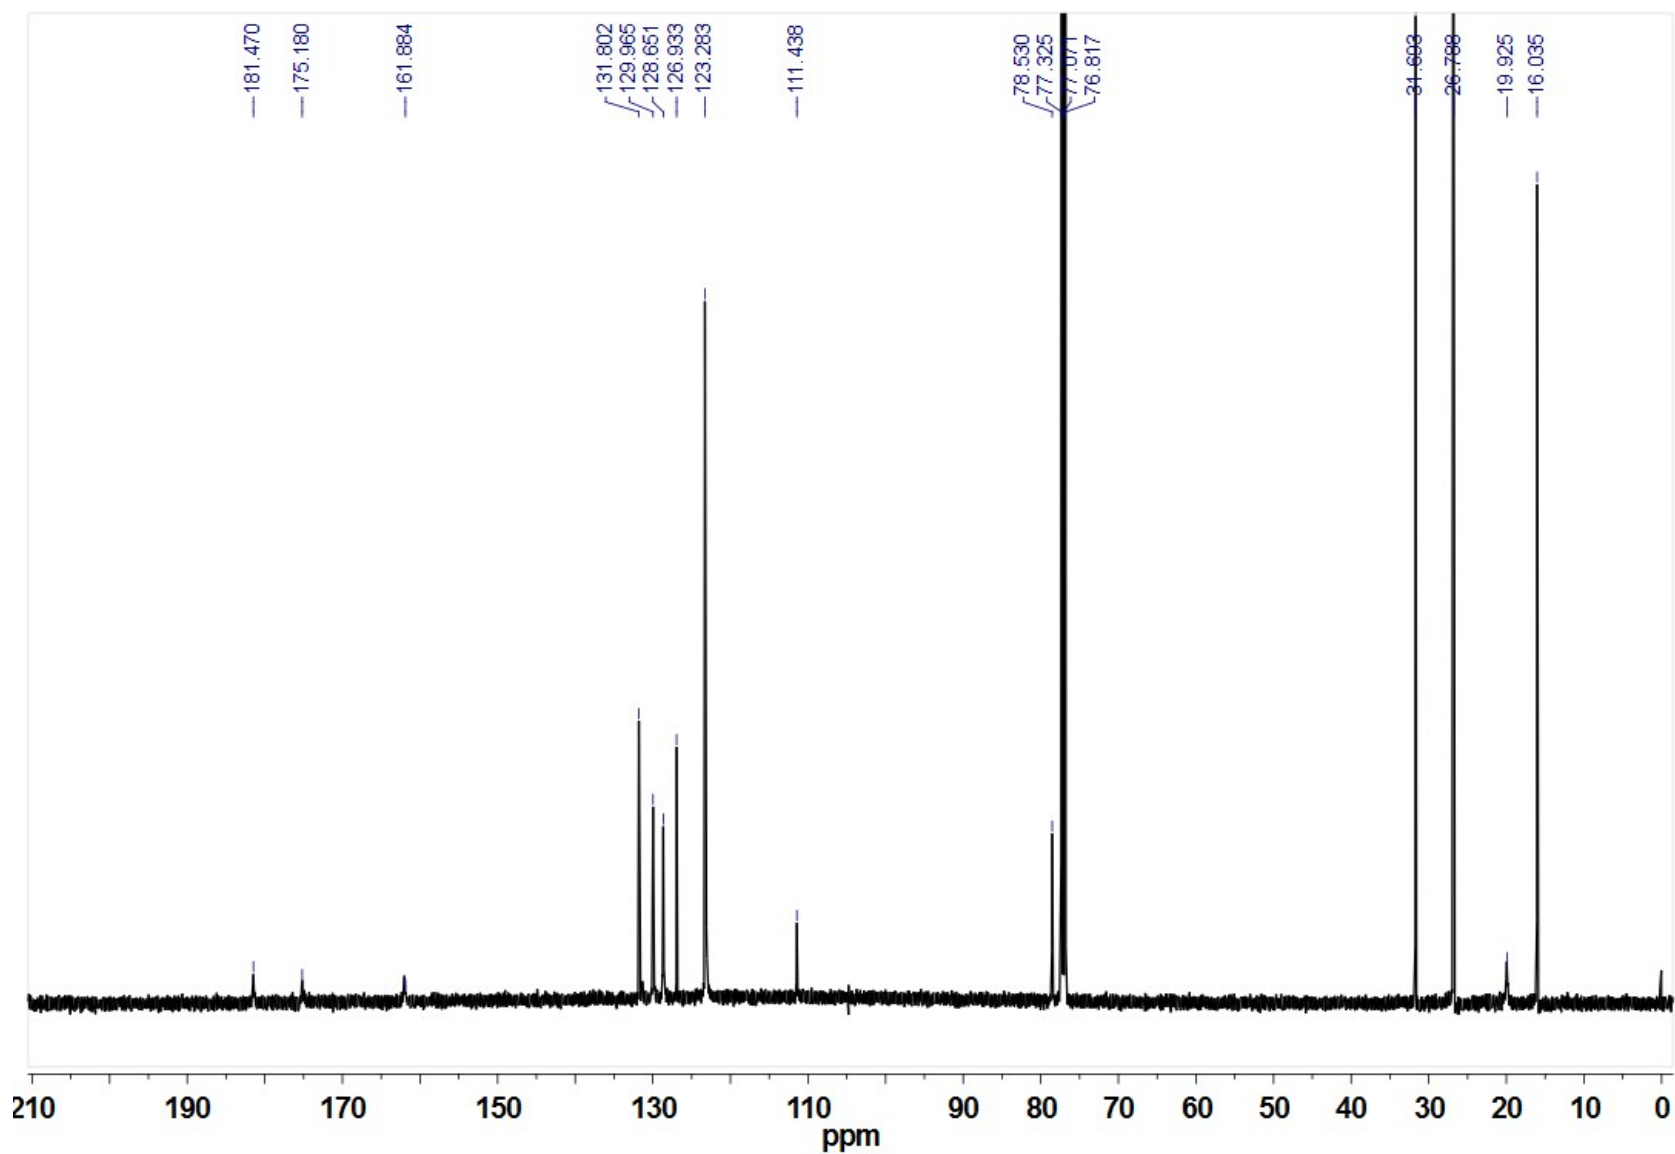

Figure S4: <sup>1</sup>H NMR of (II)

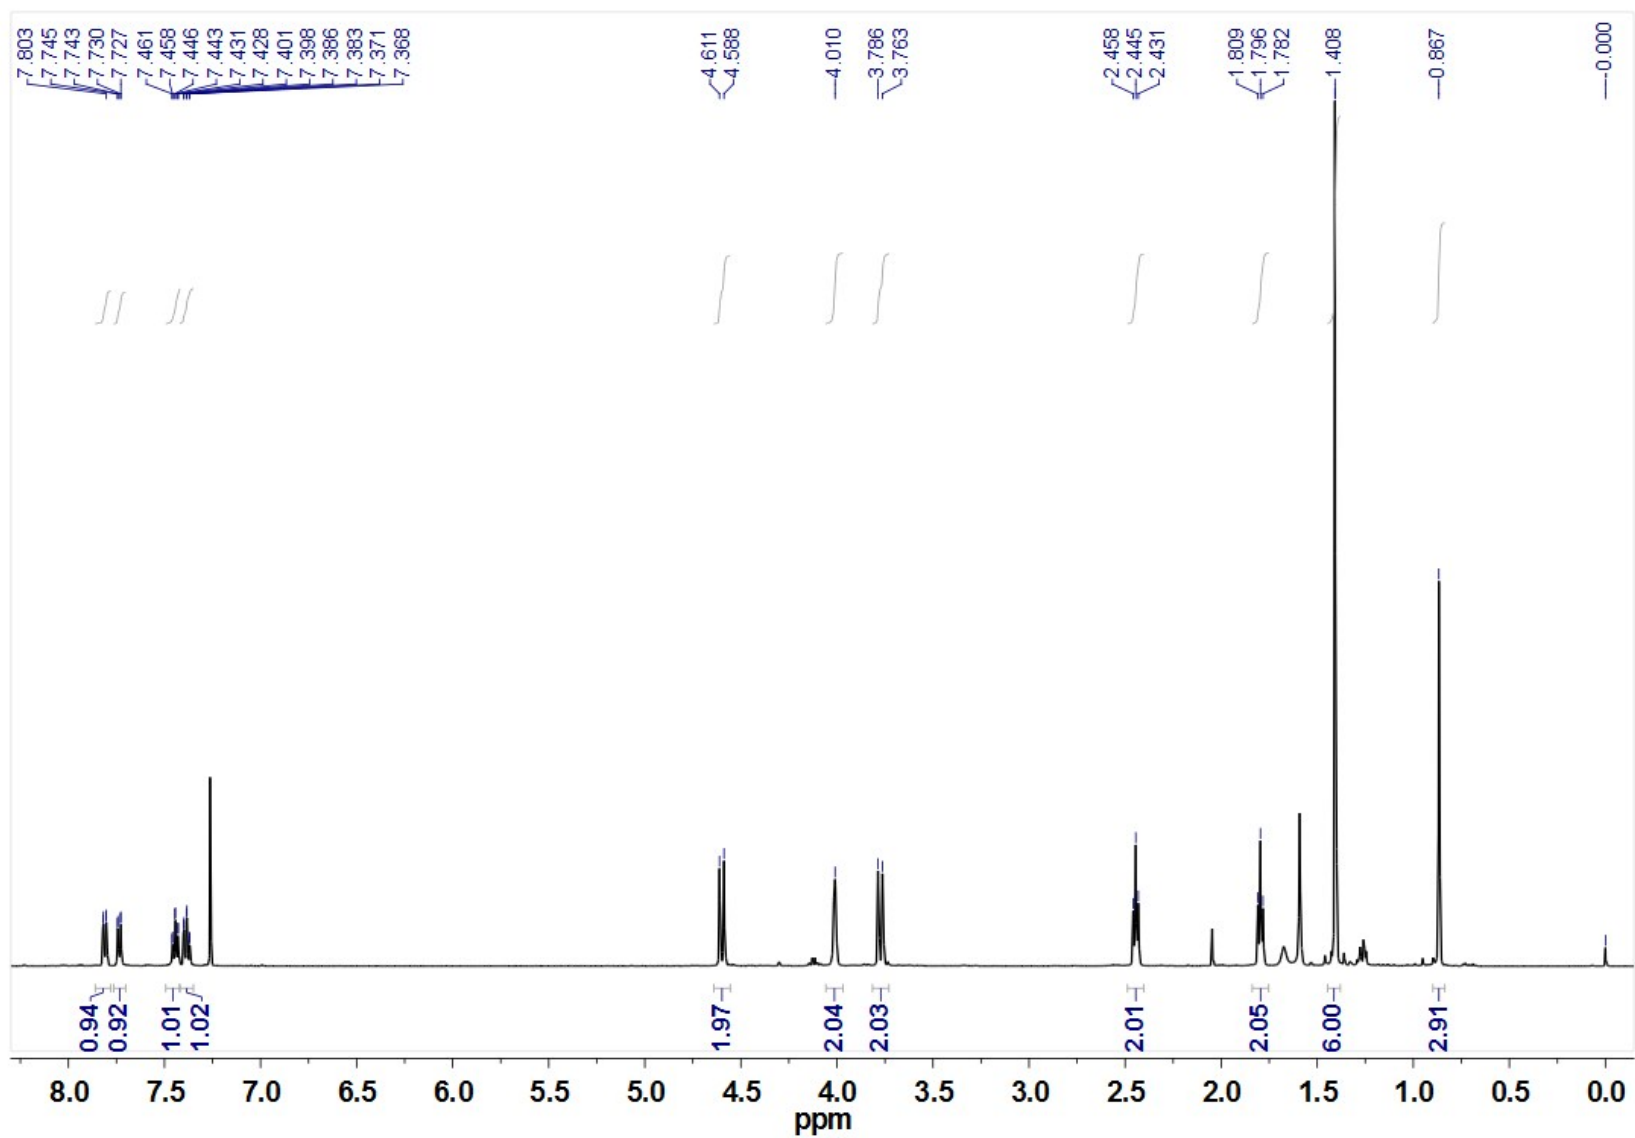

Figure S5:  $^{13}\text{C}$ NMR of (II)

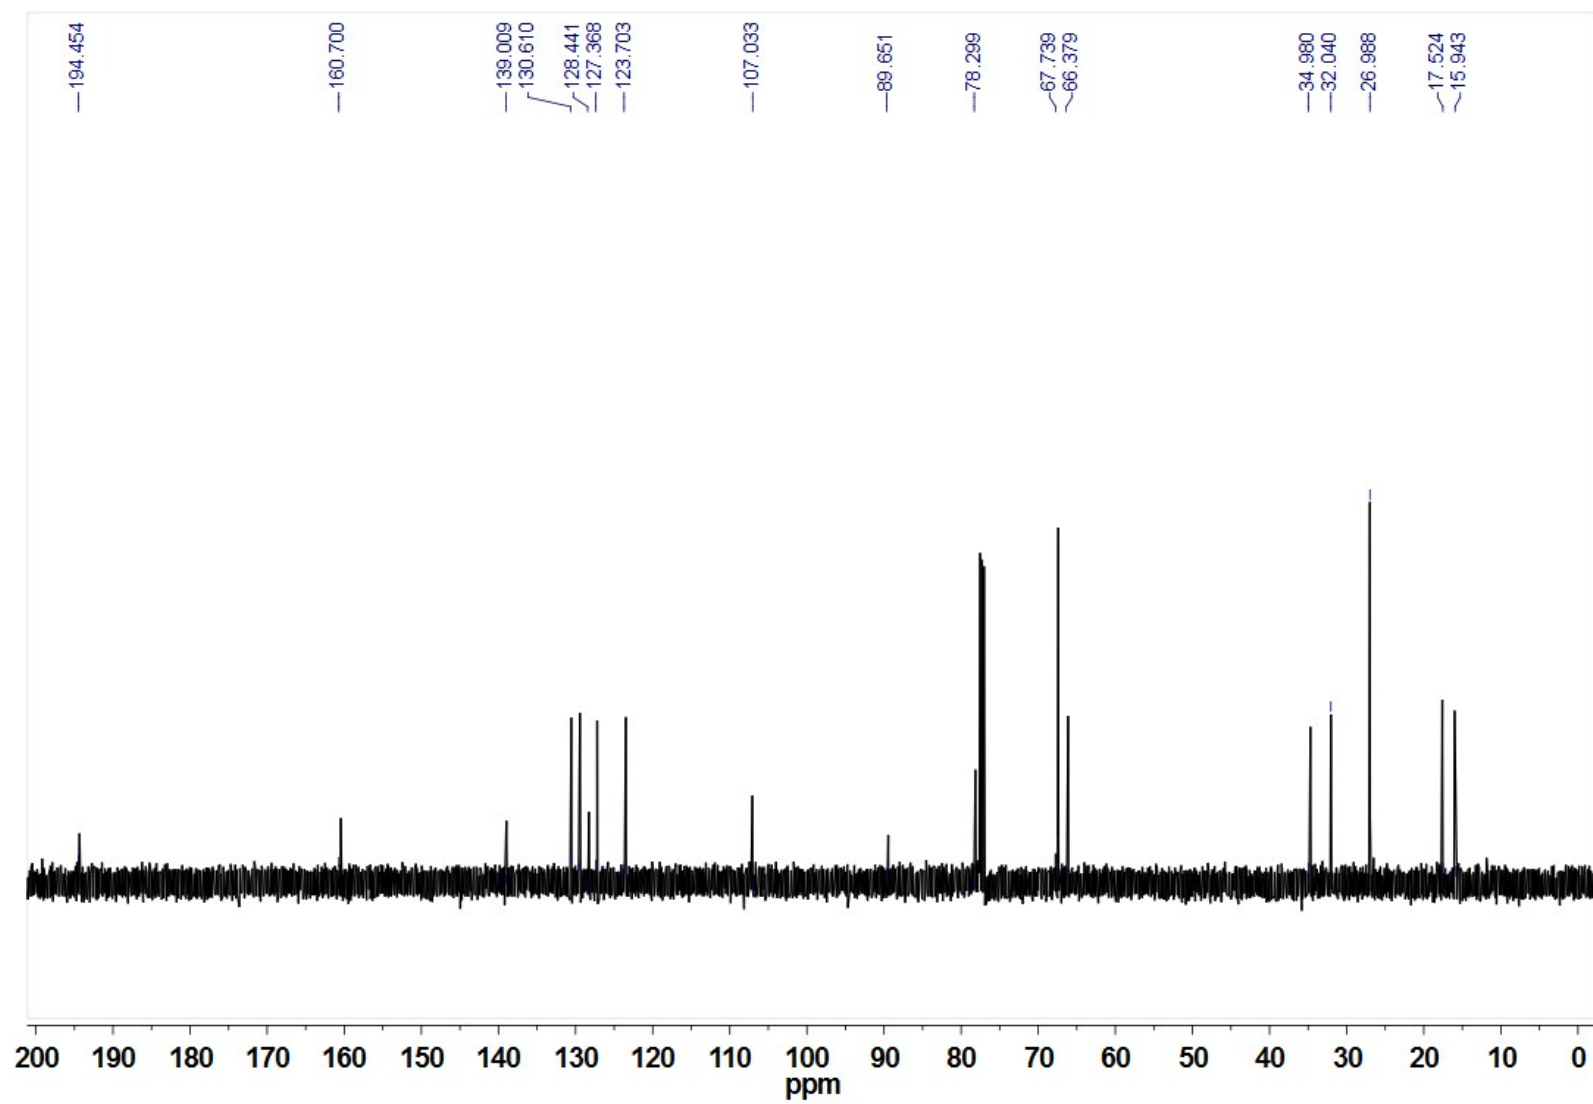



Figure S6: <sup>1</sup>H NMR of (III)

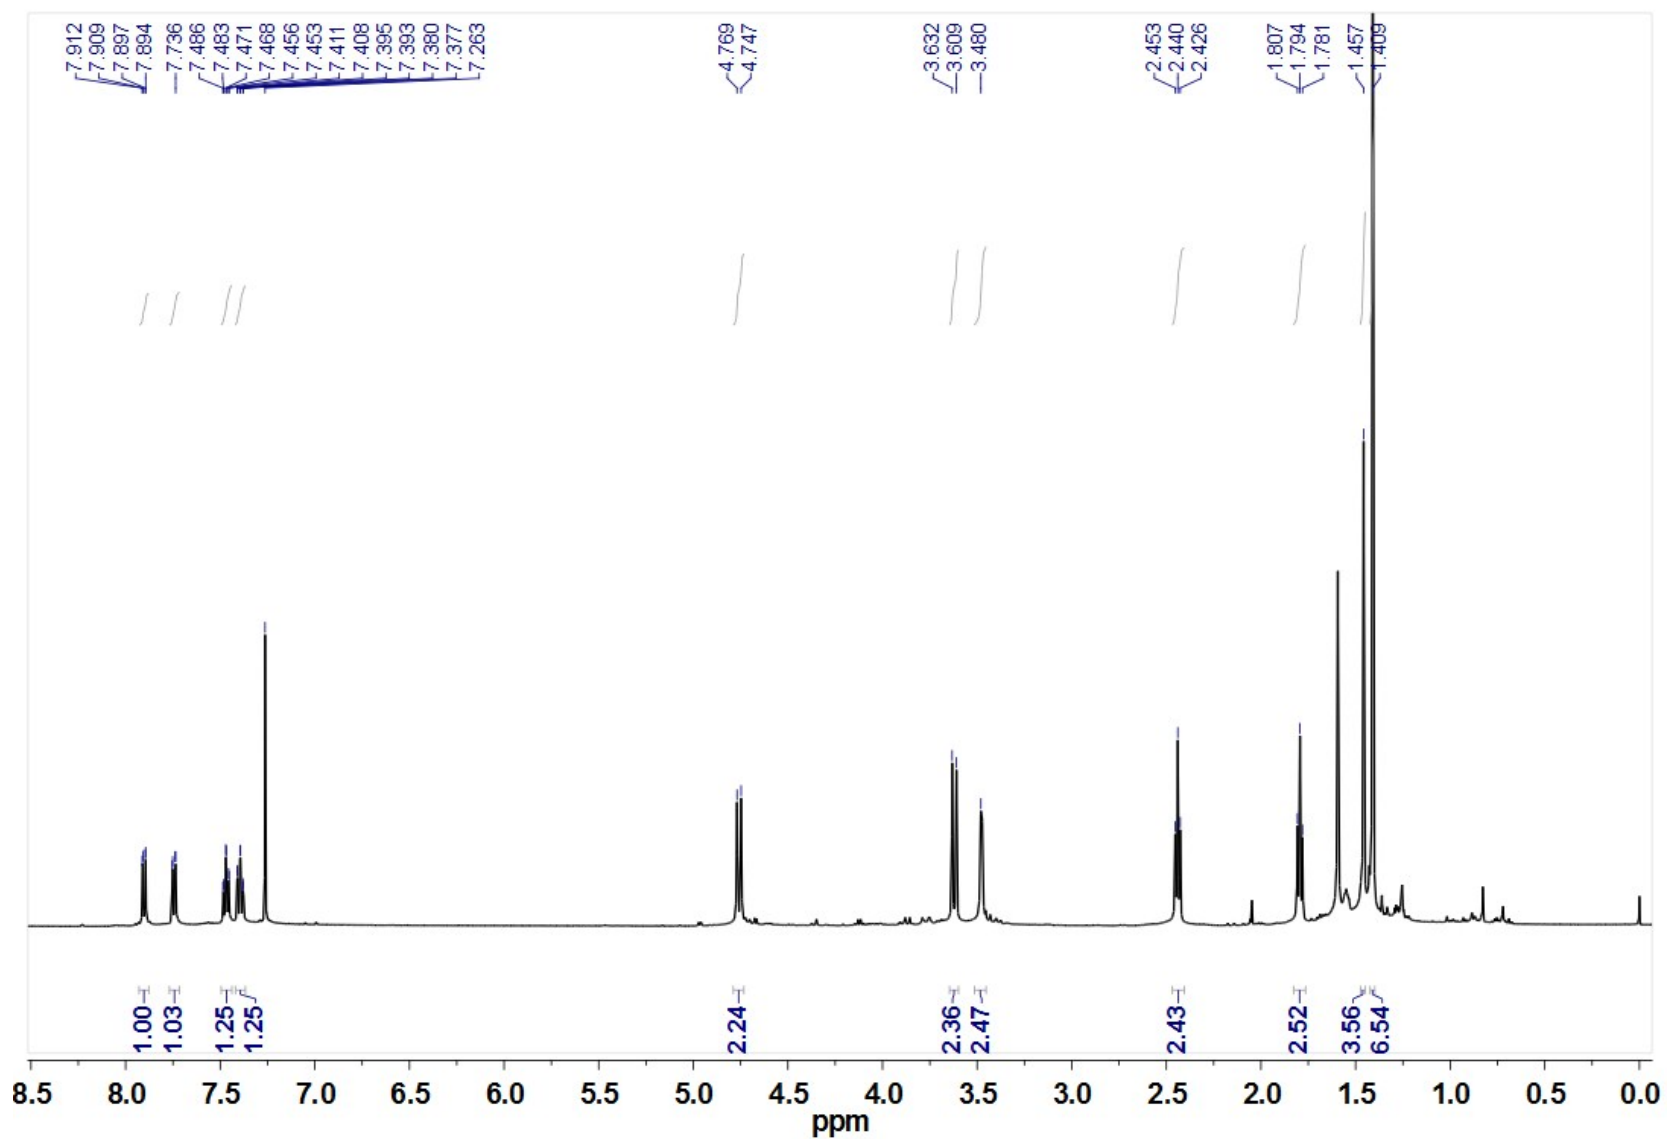

Figure S7:  $^{13}\text{C}$ NMR of (III)

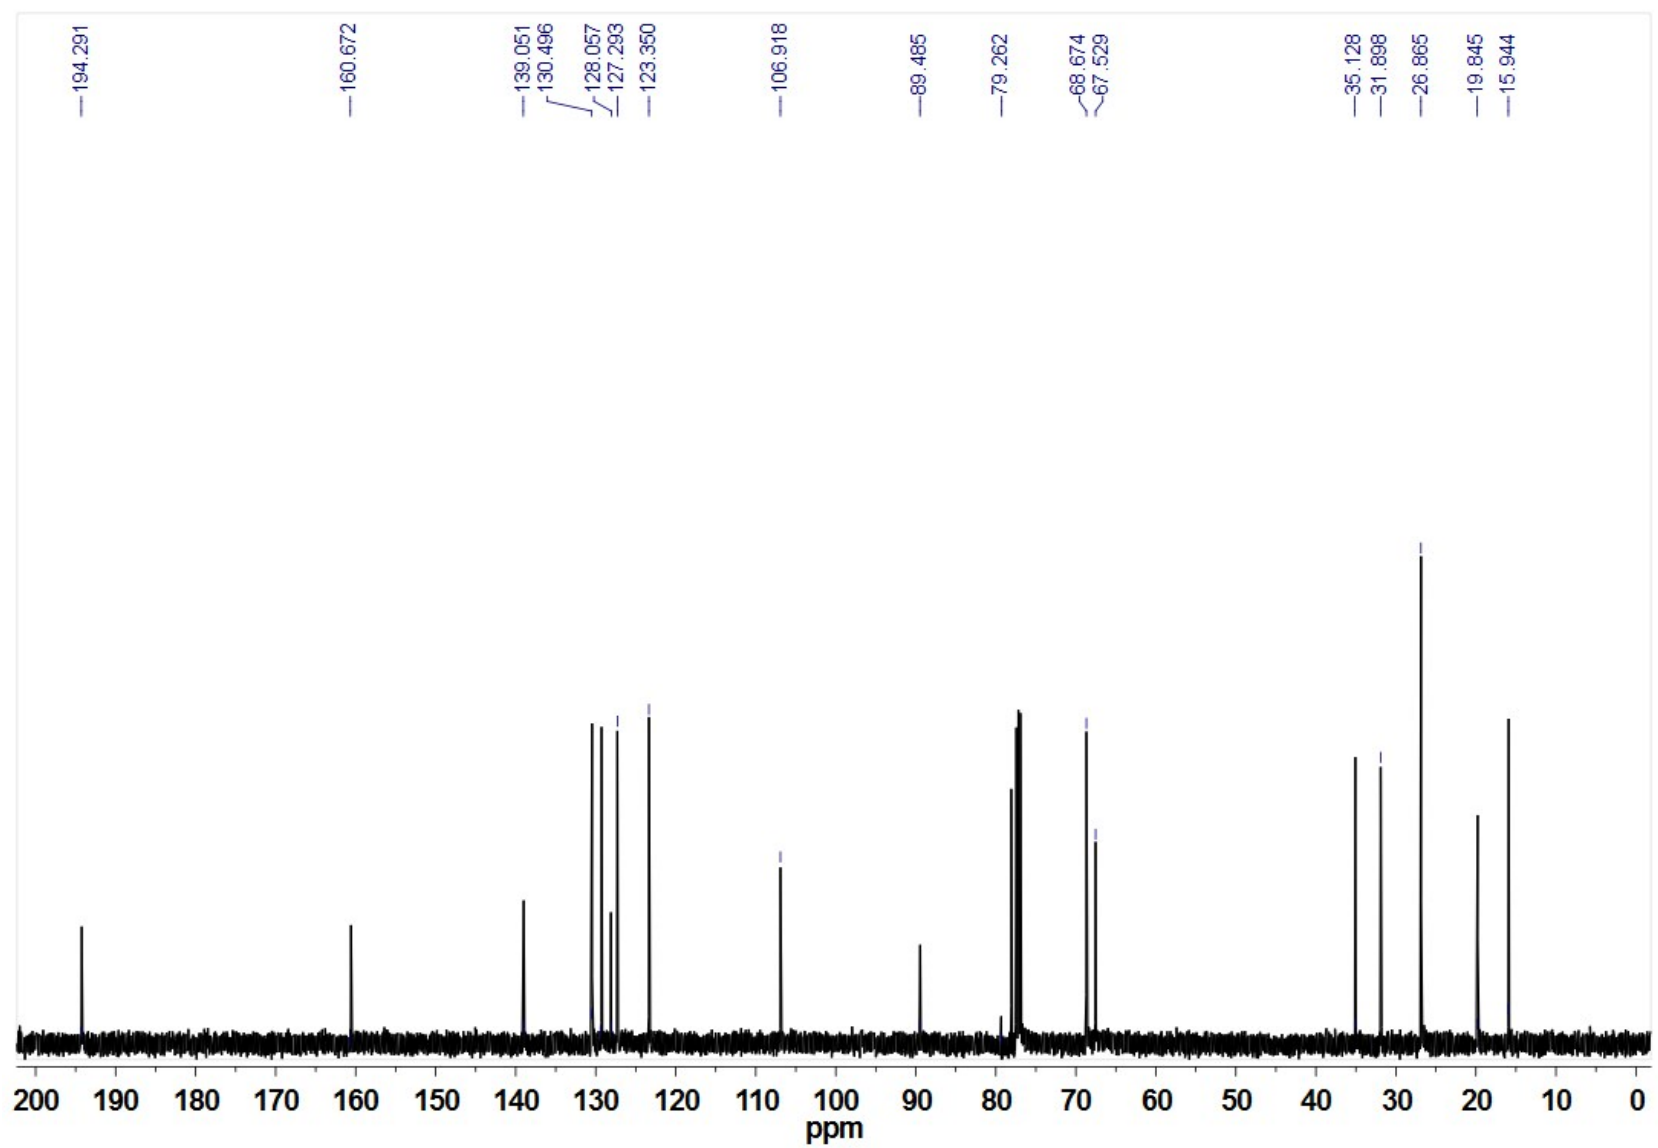

Figure S8:  $^1\text{H}$ NMR of (IV)

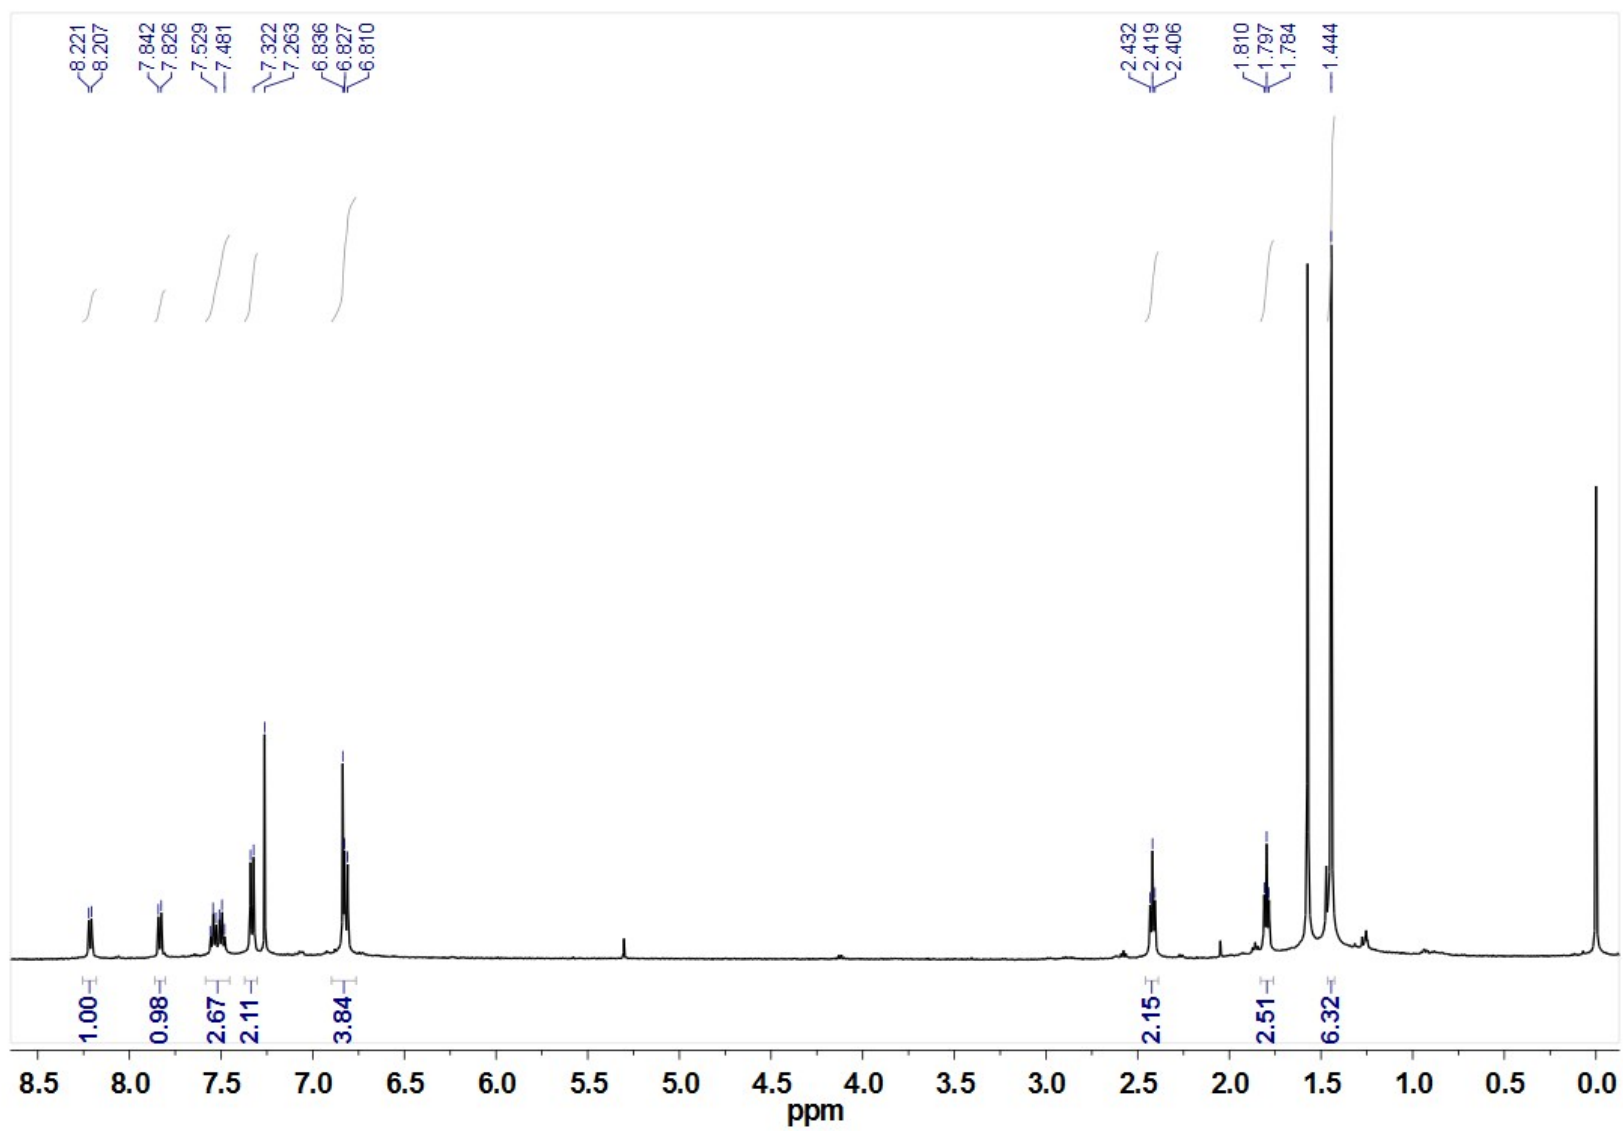

Figure S9:  $^{13}\text{C}$ NMR of (IV)

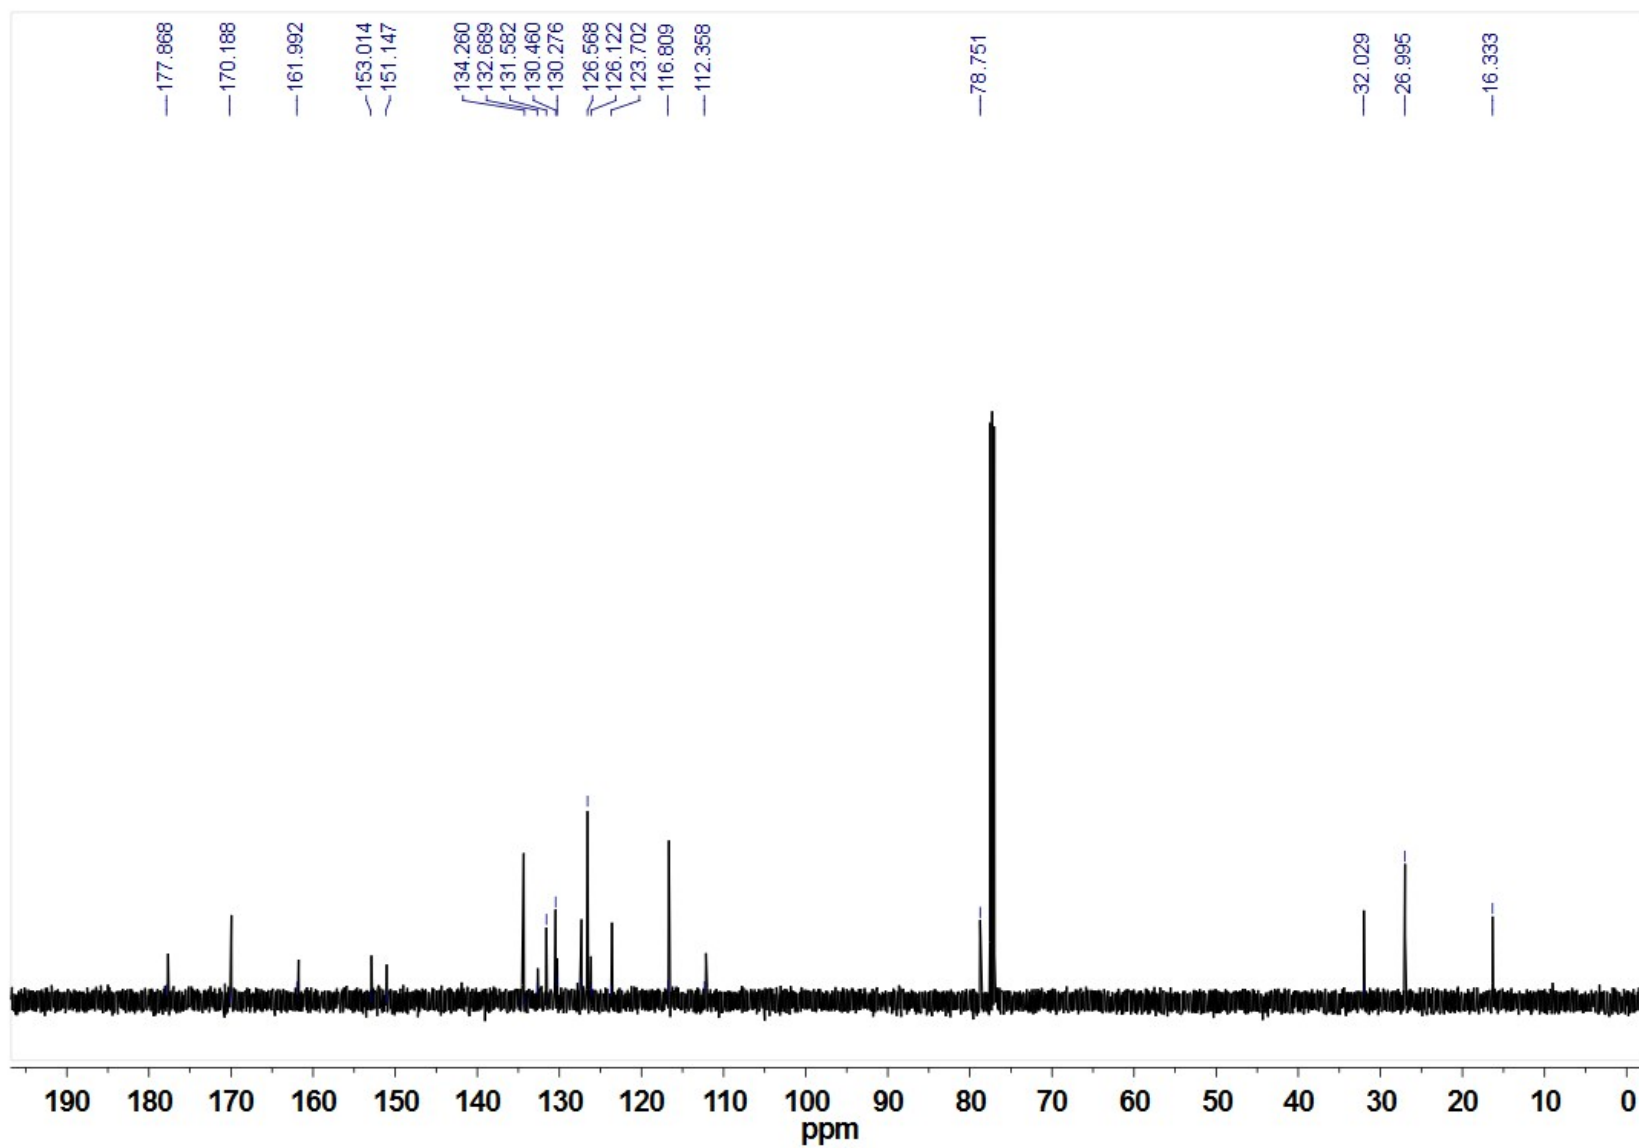

Figure S10:  $^1\text{H}$ NMR of (V)

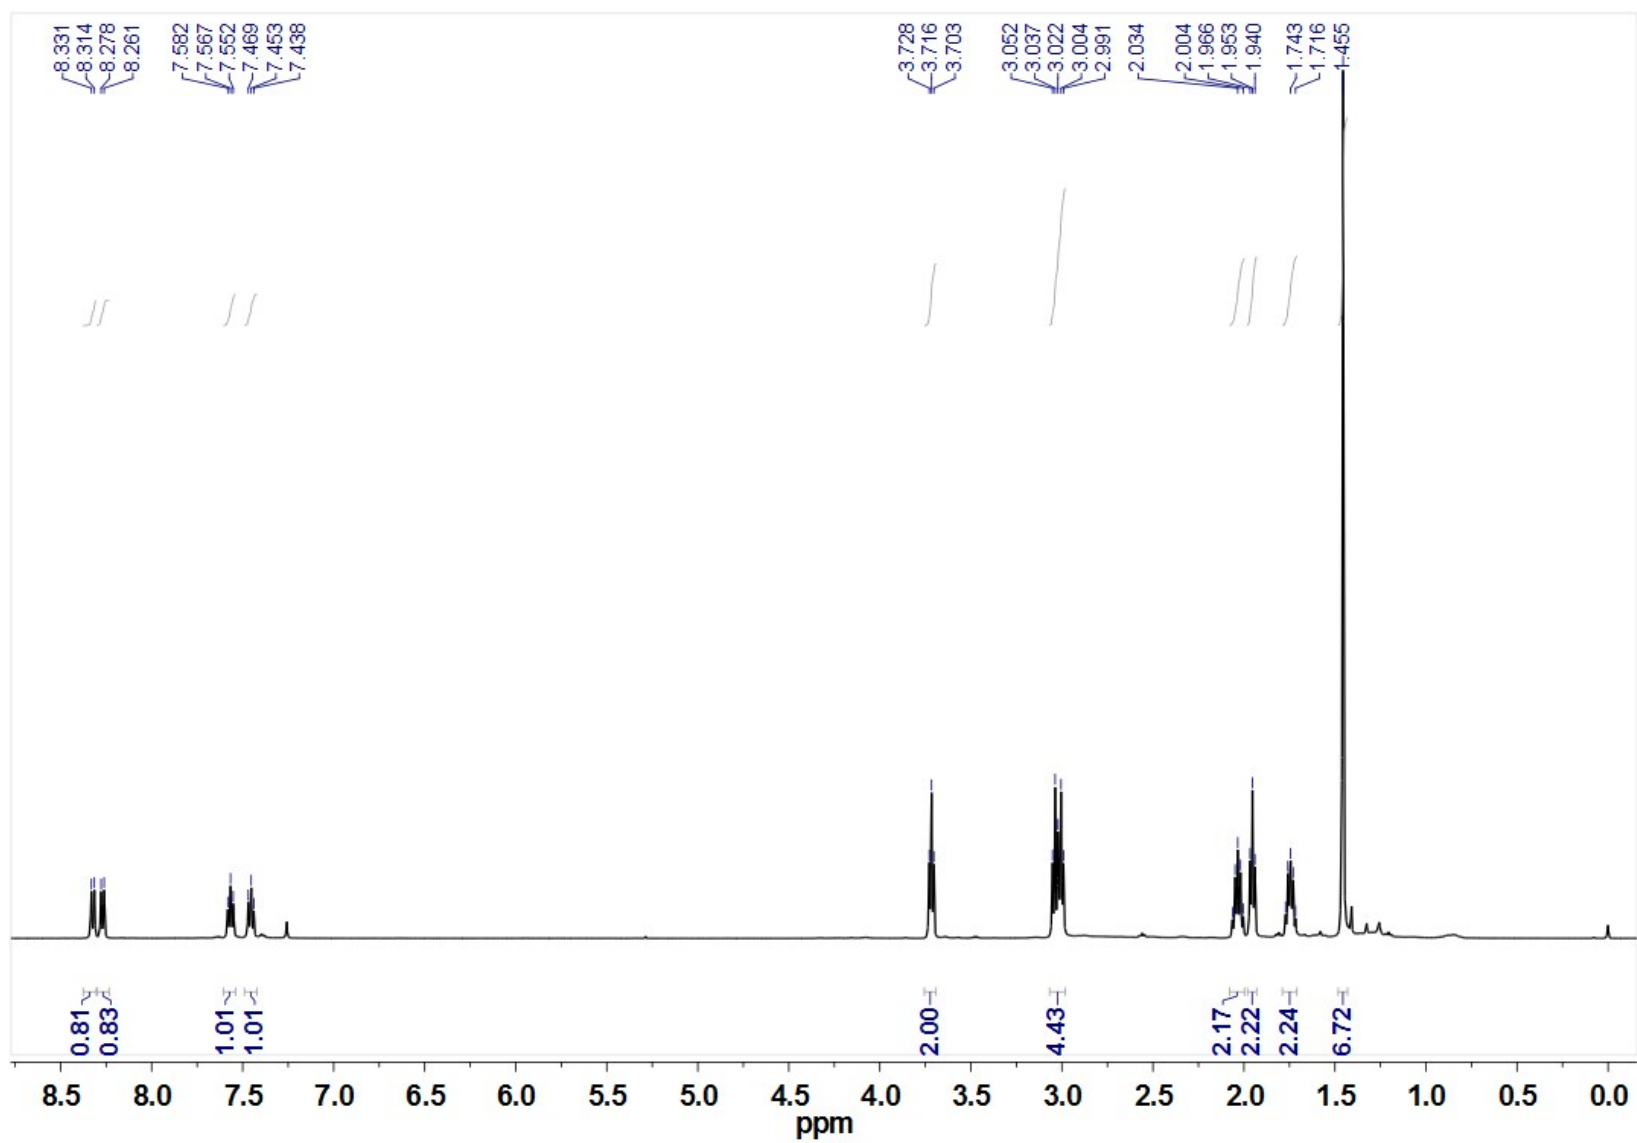

Figure S11:  $^{13}\text{C}$ NMR of (V)

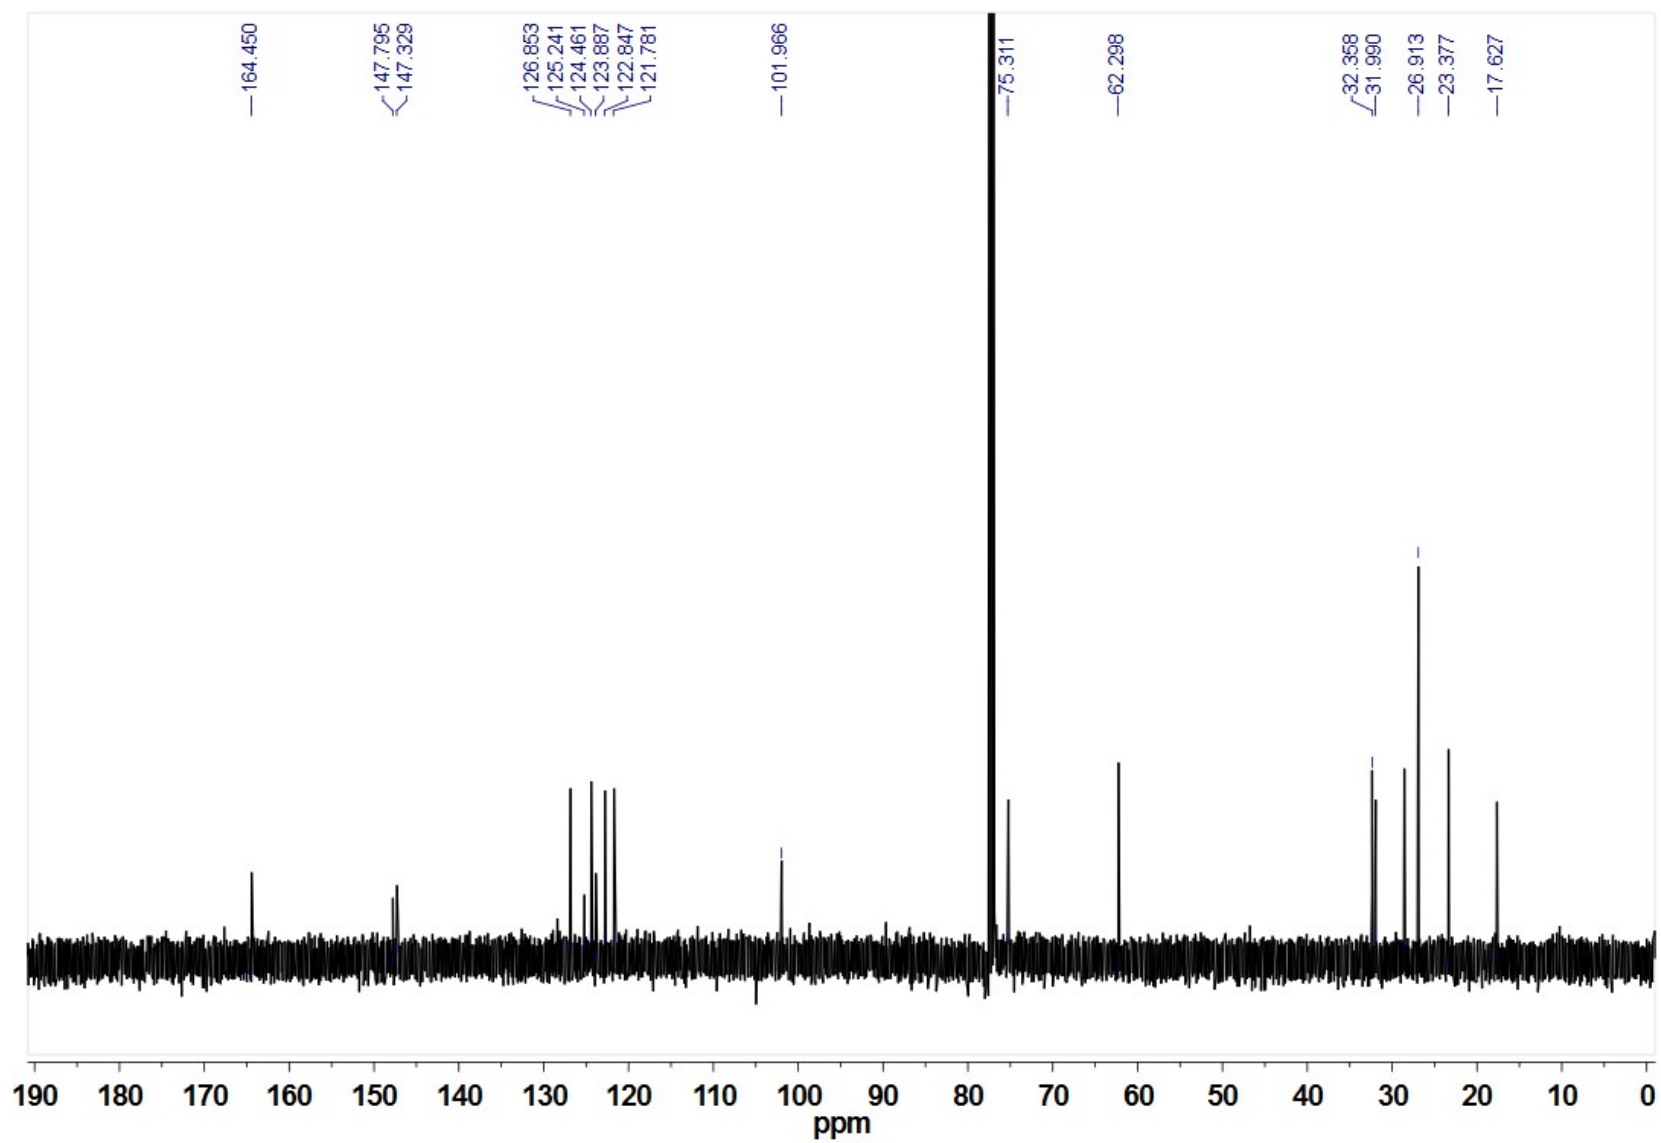

Figure S12:  $^1\text{H}$ NMR of (VI)

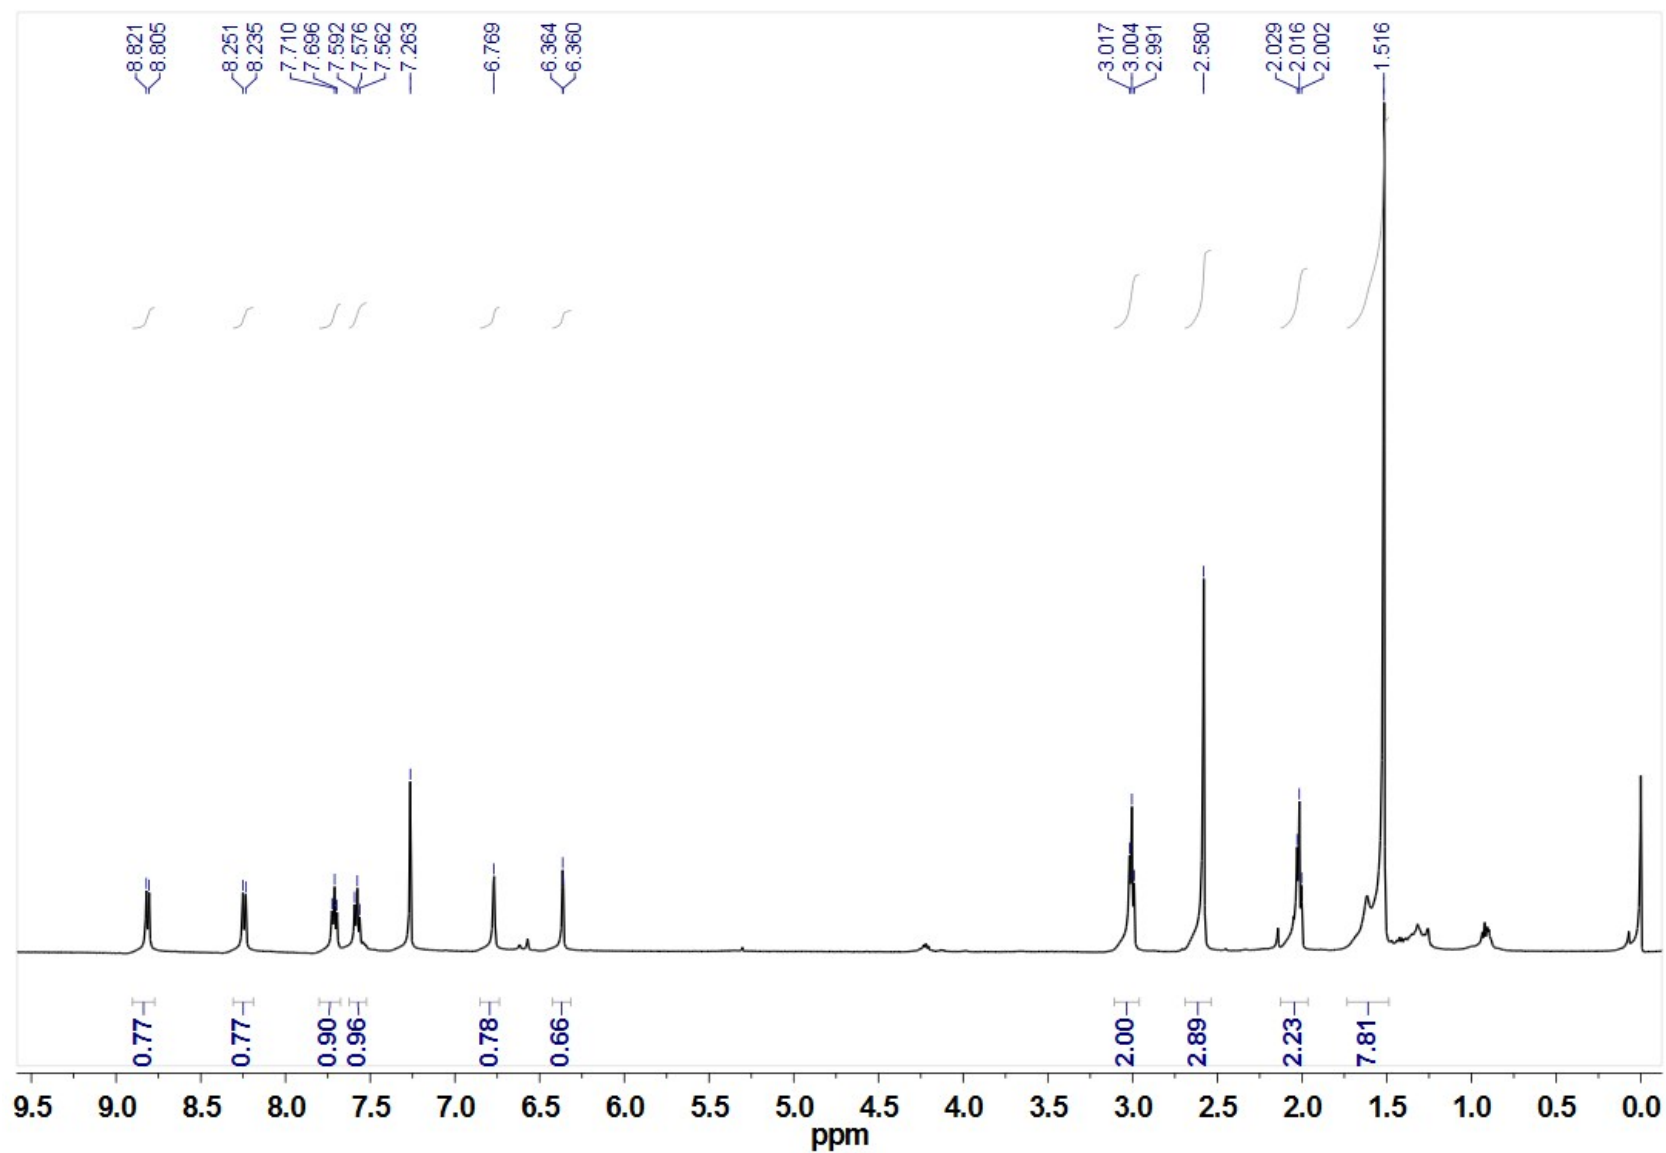

Figure S13:  $^{13}\text{C}$ NMR of (VI)

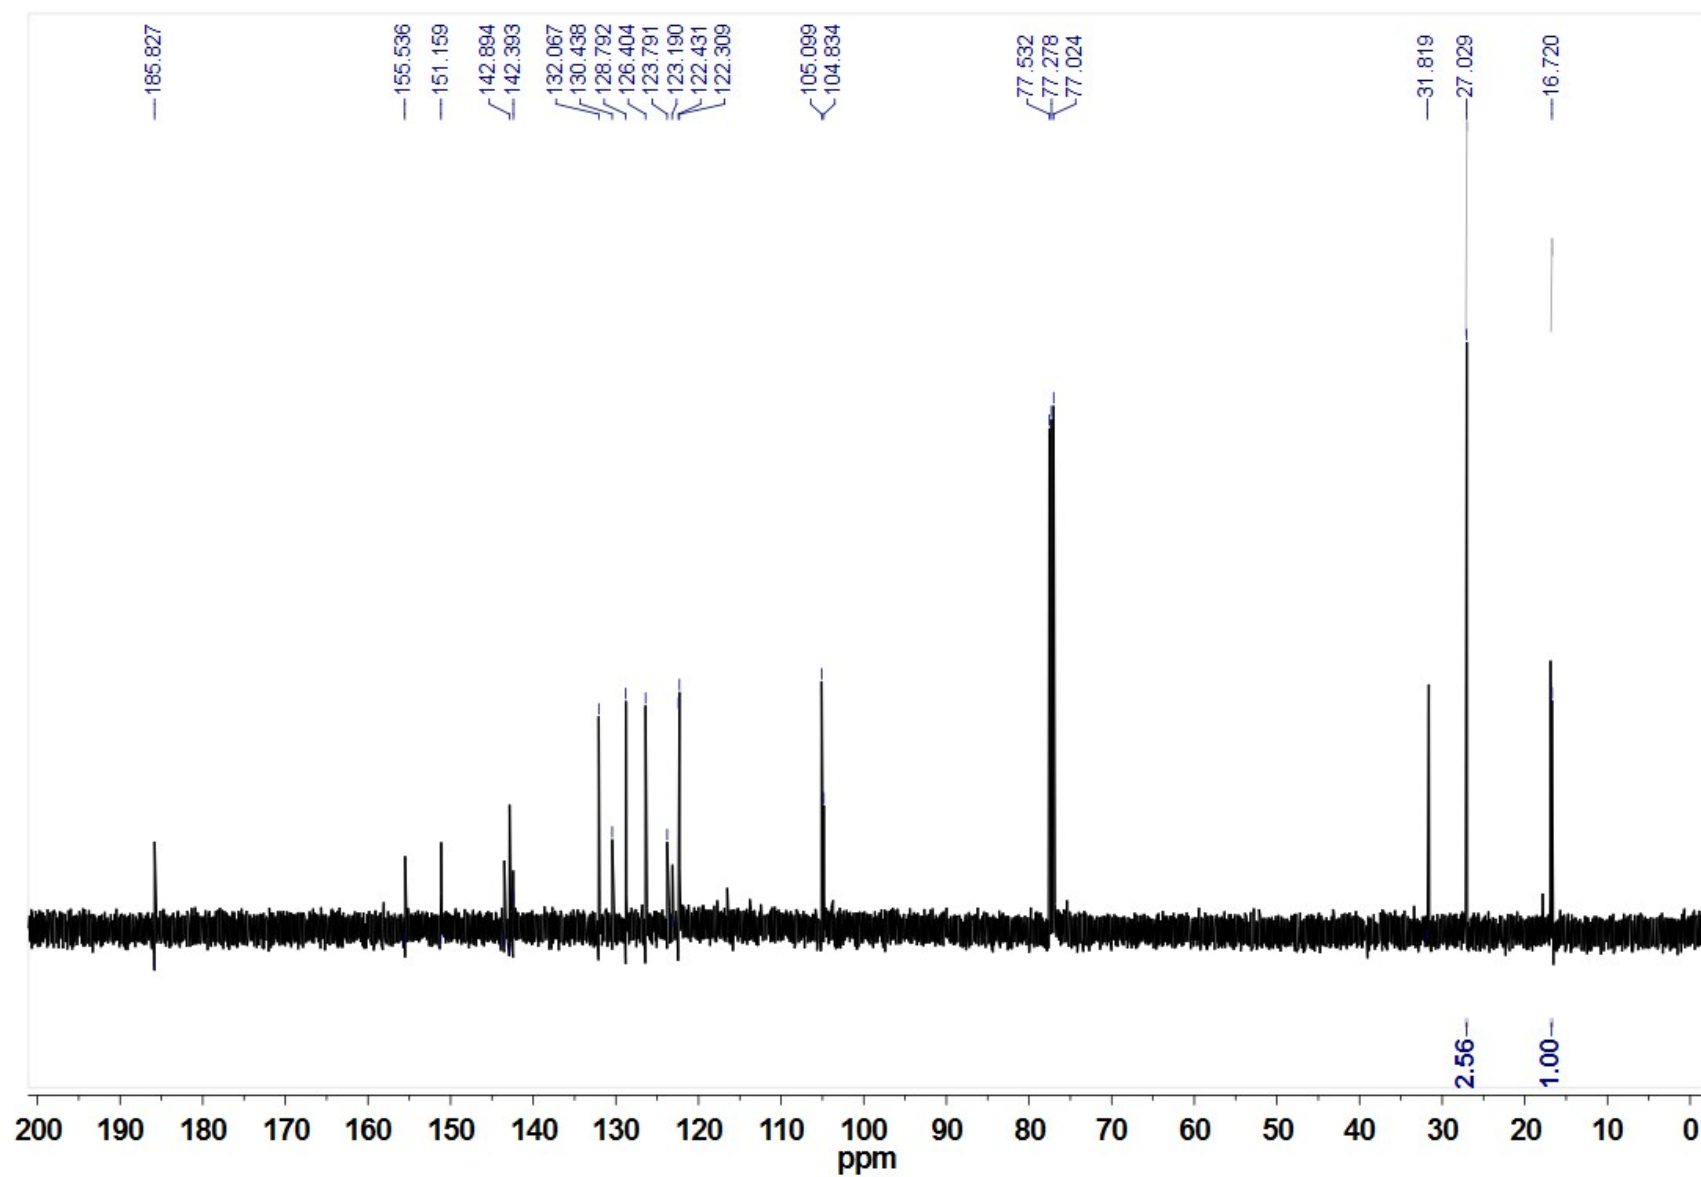



**Figure S14:** Ketal prodrug hydrolysis profile at pH 1.0 at different time point 0, 2, 6, 12 and 24 hrs: (a) prodrug (II); (b) prodrug (III).  $\beta$ -lap standard UV-Vis spectrum was overlaid for comparisons.

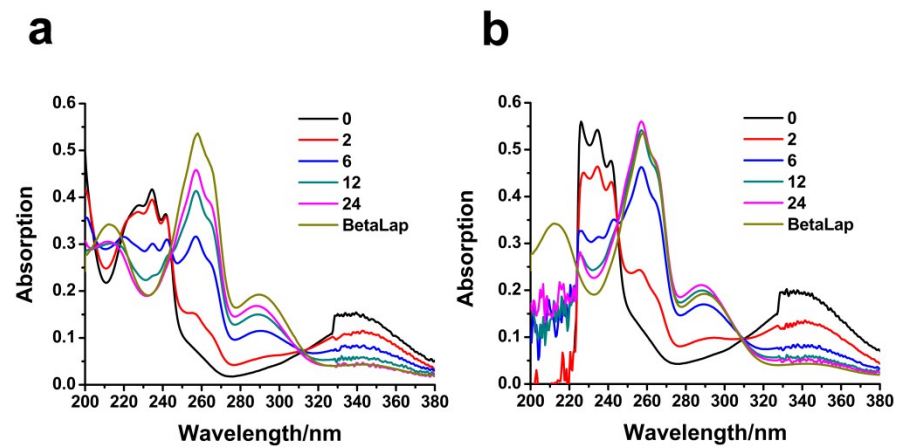

**Figure S15:** 1D-NOE of prodrug (II)

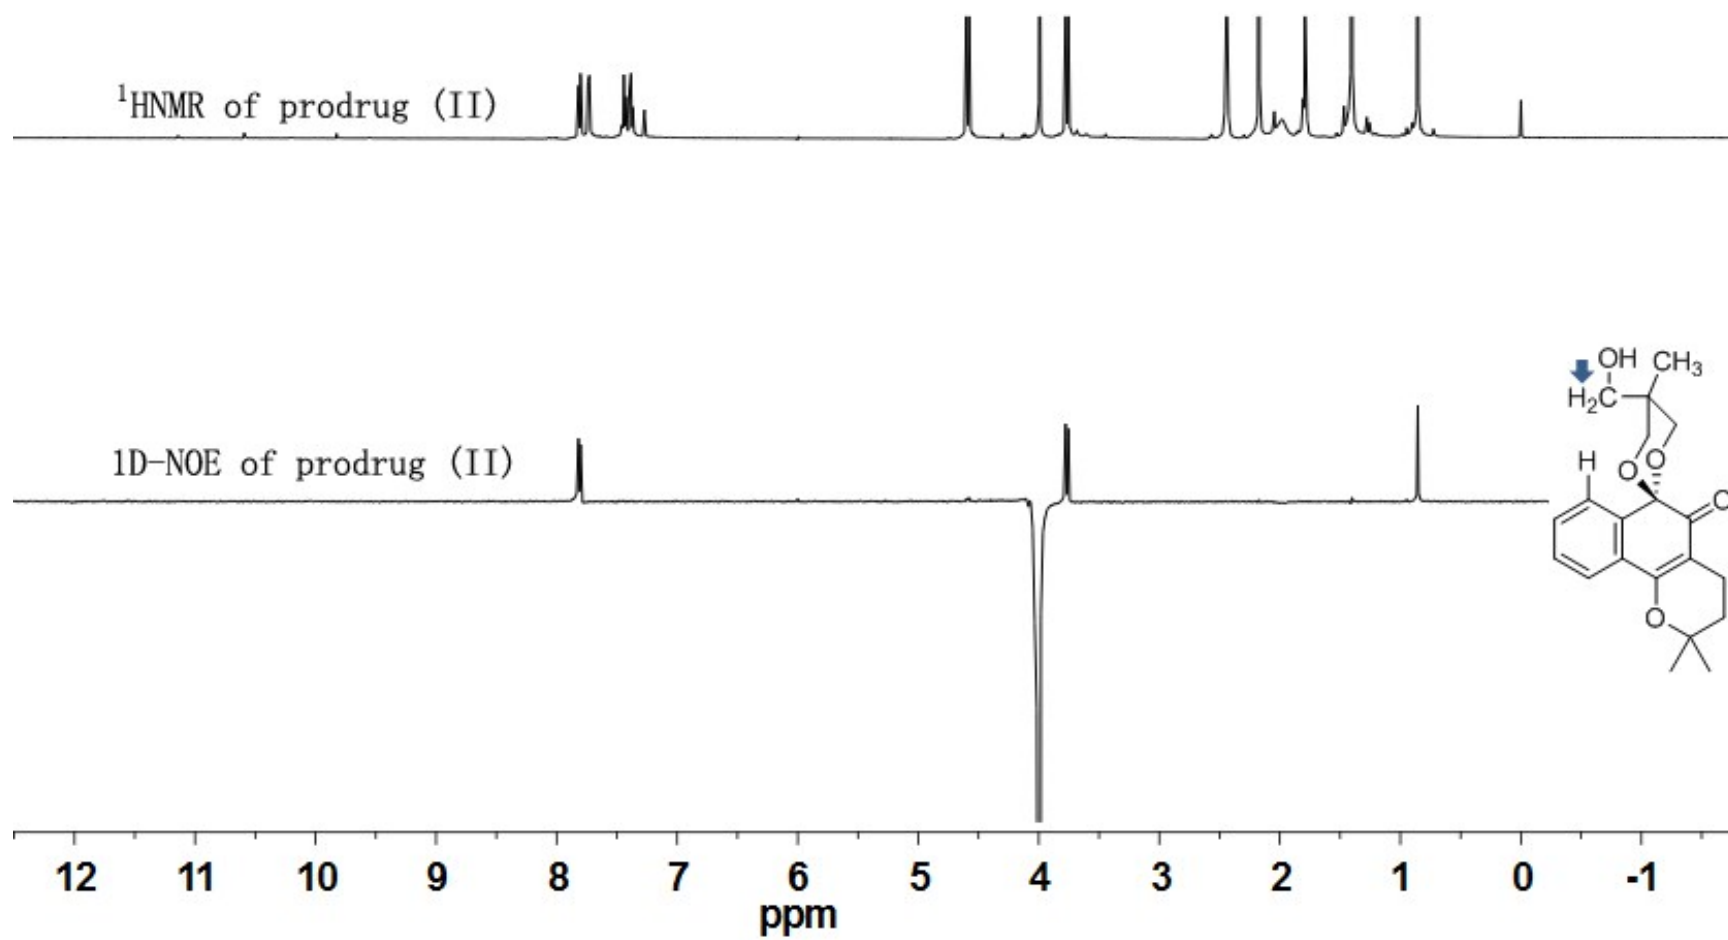

**Figure S16:** 1D-NOE of prodrug (III)

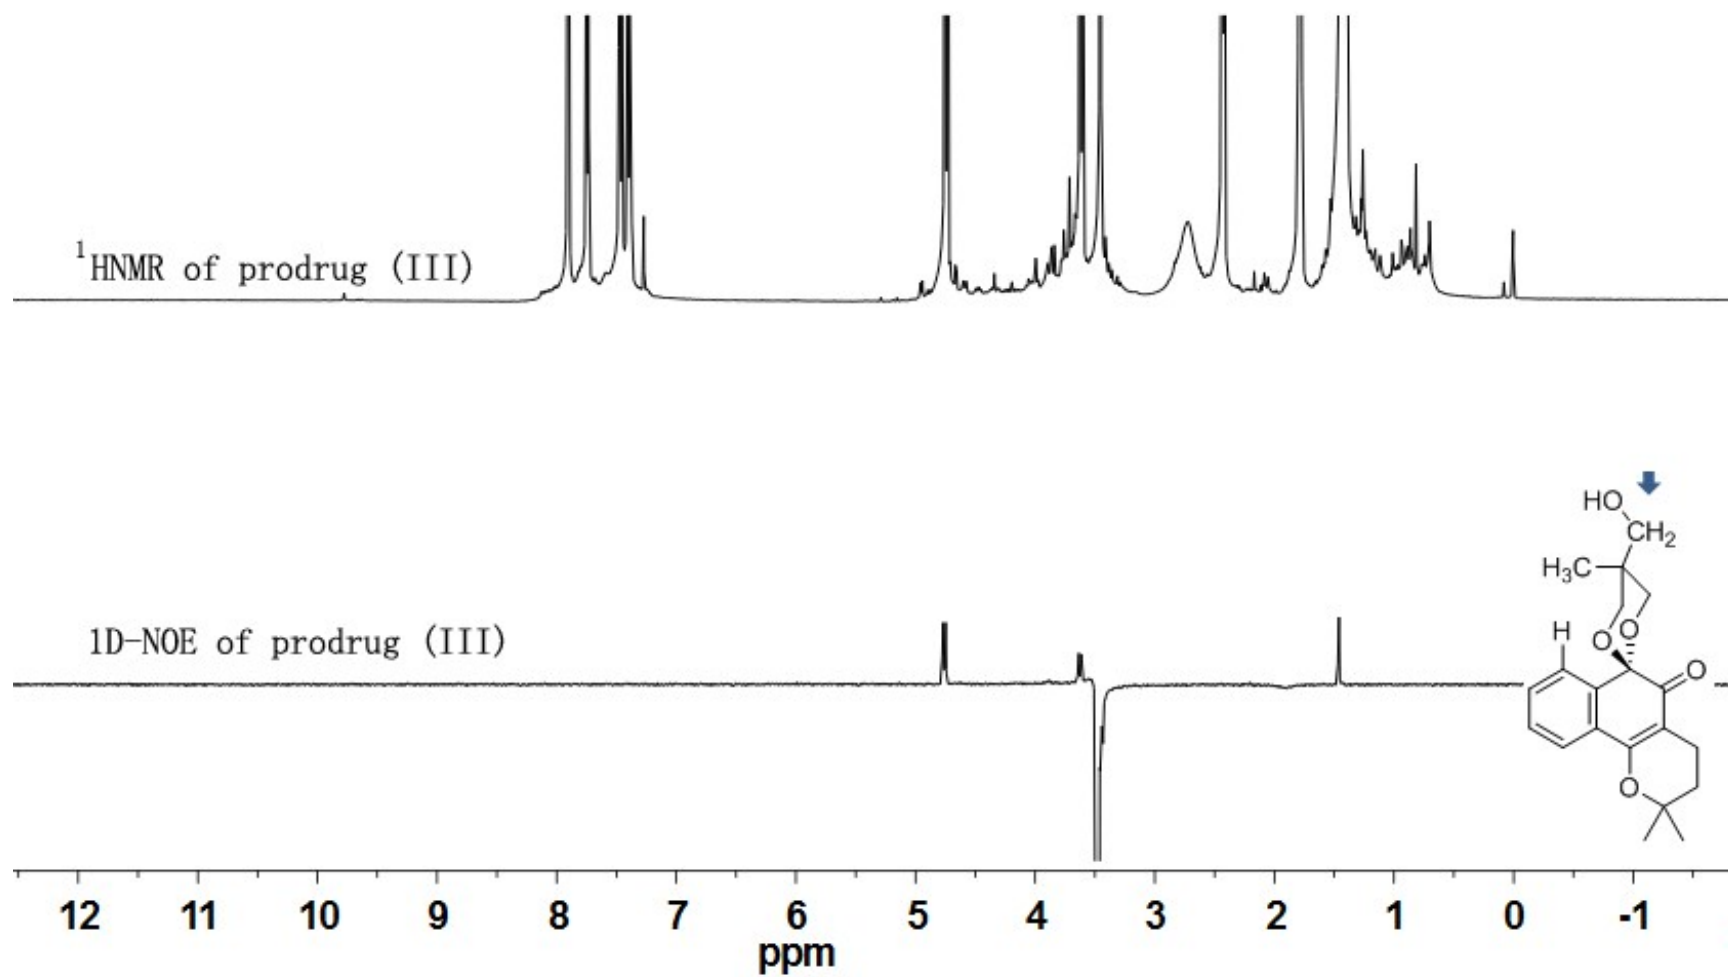

**Figure S17:** HPLC trace of polymer mPEG-*b*-P(DPA<sub>45</sub>-*r*-PDSM(IV)<sub>6</sub>) hydrolysis at pH 1.0 for 12 h and pH 5.0 for 72 h (after 72 h in pH 5.0 about 79% ( $339/427=0.79$ )  $\beta$ -Lap released from polymer micelles).

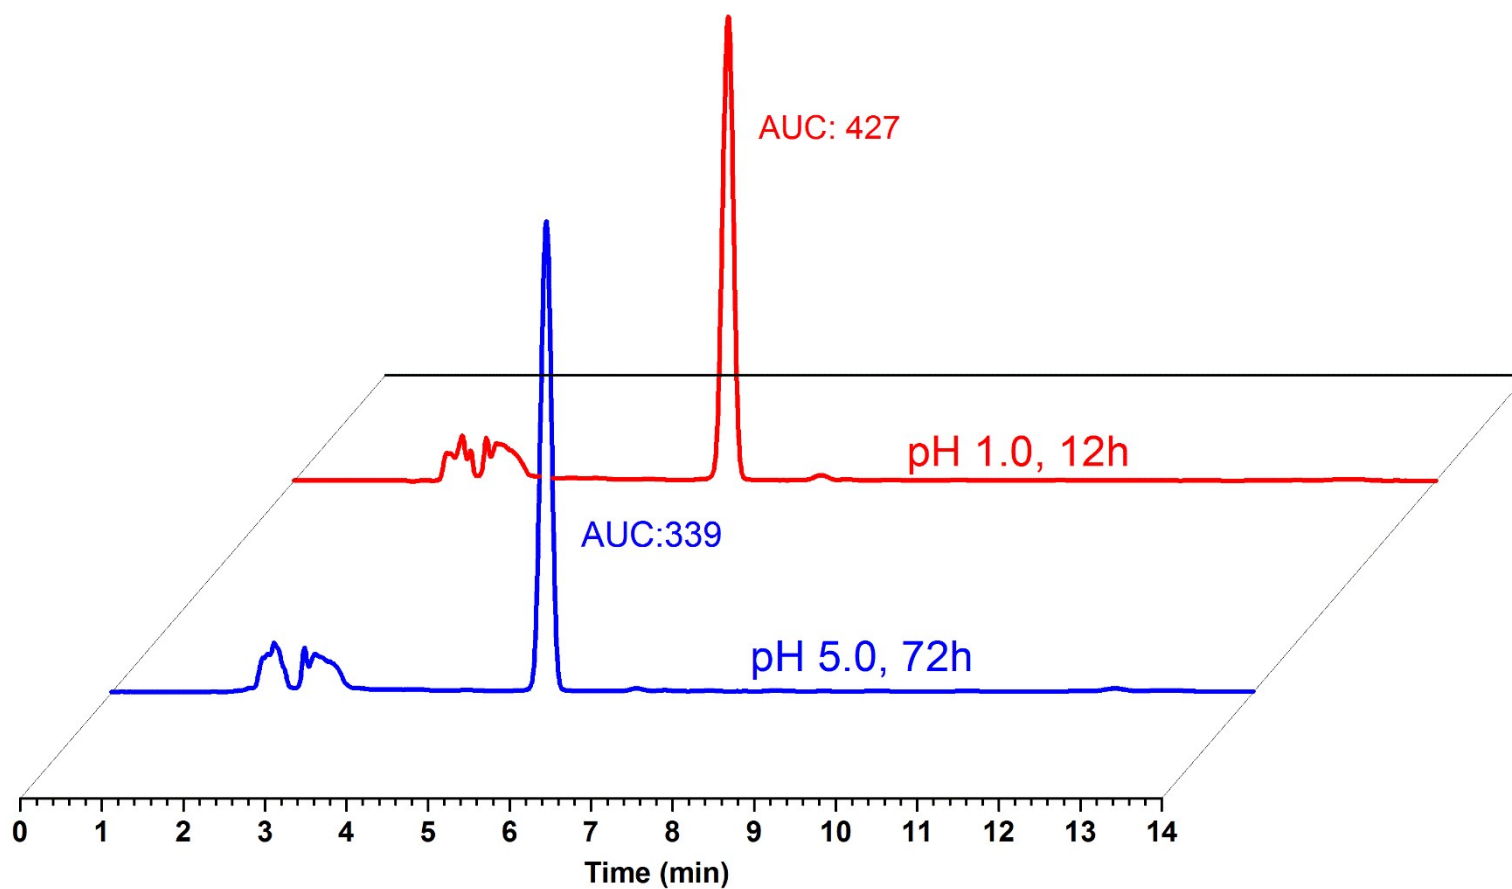

[1] A.P. Griset, J. Walpole, R. Liu, A. Gaffey, Y.L. Colson, M.W. Grinstaff, Expansile nanoparticles: synthesis, characterization, and in vivo efficacy of an acid-responsive polymeric drug delivery system, *J. Am. Chem. Soc.*, 131 (2009) 2469-2471.
